# Supplementary material for: Synthesis, characterisation and Pickering emulsifier performance of poly(stearyl methacrylate)–poly(N-2-(methacryloyloxy)ethyl pyrrolidone) diblock copolymer nano-objects via RAFT dispersion polymerisation in n-dodecane
Source: PubMed Central journal article supplement (PMC5361141; doi:10.1039/c6py00138f), 2016-02-18
Supplement: PY-007-C6PY00138F-s001.pdf [file PY-007-C6PY00138F-s001.pdf]

## Supporting Information for:

### Synthesis, characterisation and Pickering emulsifier performance of poly(stearyl methacrylate)-poly(*N*-2-(methacryloyloxy)ethyl pyrrolidone) diblock copolymer nano-objects via RAFT dispersion polymerisation in *n*-dodecane

Victoria J. Cunningham and Steven P. Armes\*

*Department of Chemistry, University of Sheffield,  
Brook Hill, Sheffield, South Yorkshire, S3 7HF, UK.*

Osama M. Musa

*Ashland Specialty Ingredients, 1005 US 202/206,  
Bridgewater, NJ 08807, USA.*

#### Synthesis of PSMA<sub>14</sub>-PBzMA<sub>95</sub> via RAFT dispersion polymerisation of SMA

PSMA<sub>14</sub> macro-CTA (0.2201 g), BzMA (0.7728 g, 4.386 mmol), T21s (2.37 mg, 26 μmol; dissolved at 10% v/v in *n*-dodecane; CTA/T21s molar ratio = 4.0) were dissolved in *n*-dodecane (4.13.9713 g, 10% w/w) in a 25 ml round-bottomed flask. The reaction mixture was sealed and purged with nitrogen for 30 min, prior to immersion in an oil bath set at 90 °C. Aliquots were taken every 10 min for the first hour and analysed by <sup>1</sup>H NMR analysis. A final conversion of 95% was achieved after 6 h. The resulting copolymer was analysed using 3:1 chloroform/methanol GPC ( $M_n = 23,800 \text{ g mol}^{-1}$ ,  $M_w/M_n = 1.10$  vs. PMMA standards). DLS studies on a 0.20% w/w copolymer dispersion indicated an intensity-average particle diameter of 181 nm (DLS polydispersity, PDI = 0.260). TEM studies confirmed a worm-like morphology at 95 % conversion.

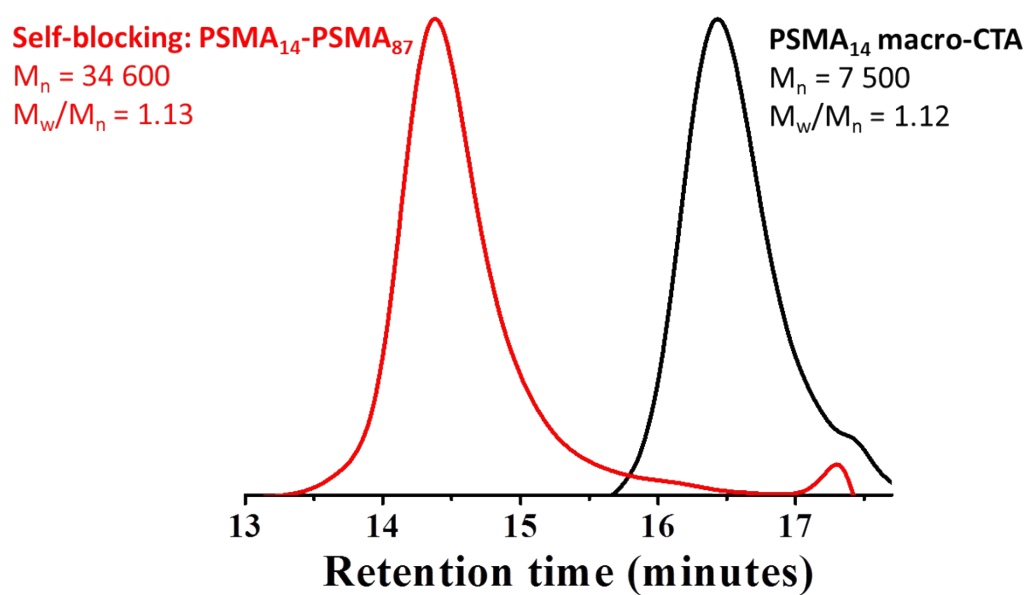

**Figure S1.** 3:1 Chloroform/methanol GPC curves obtained for the initial PSMA<sub>14</sub> macro-CTA and the corresponding PSMA<sub>14</sub>-PSMA<sub>87</sub> after a 'self-blocking' chain extension experiment at 90 °C.

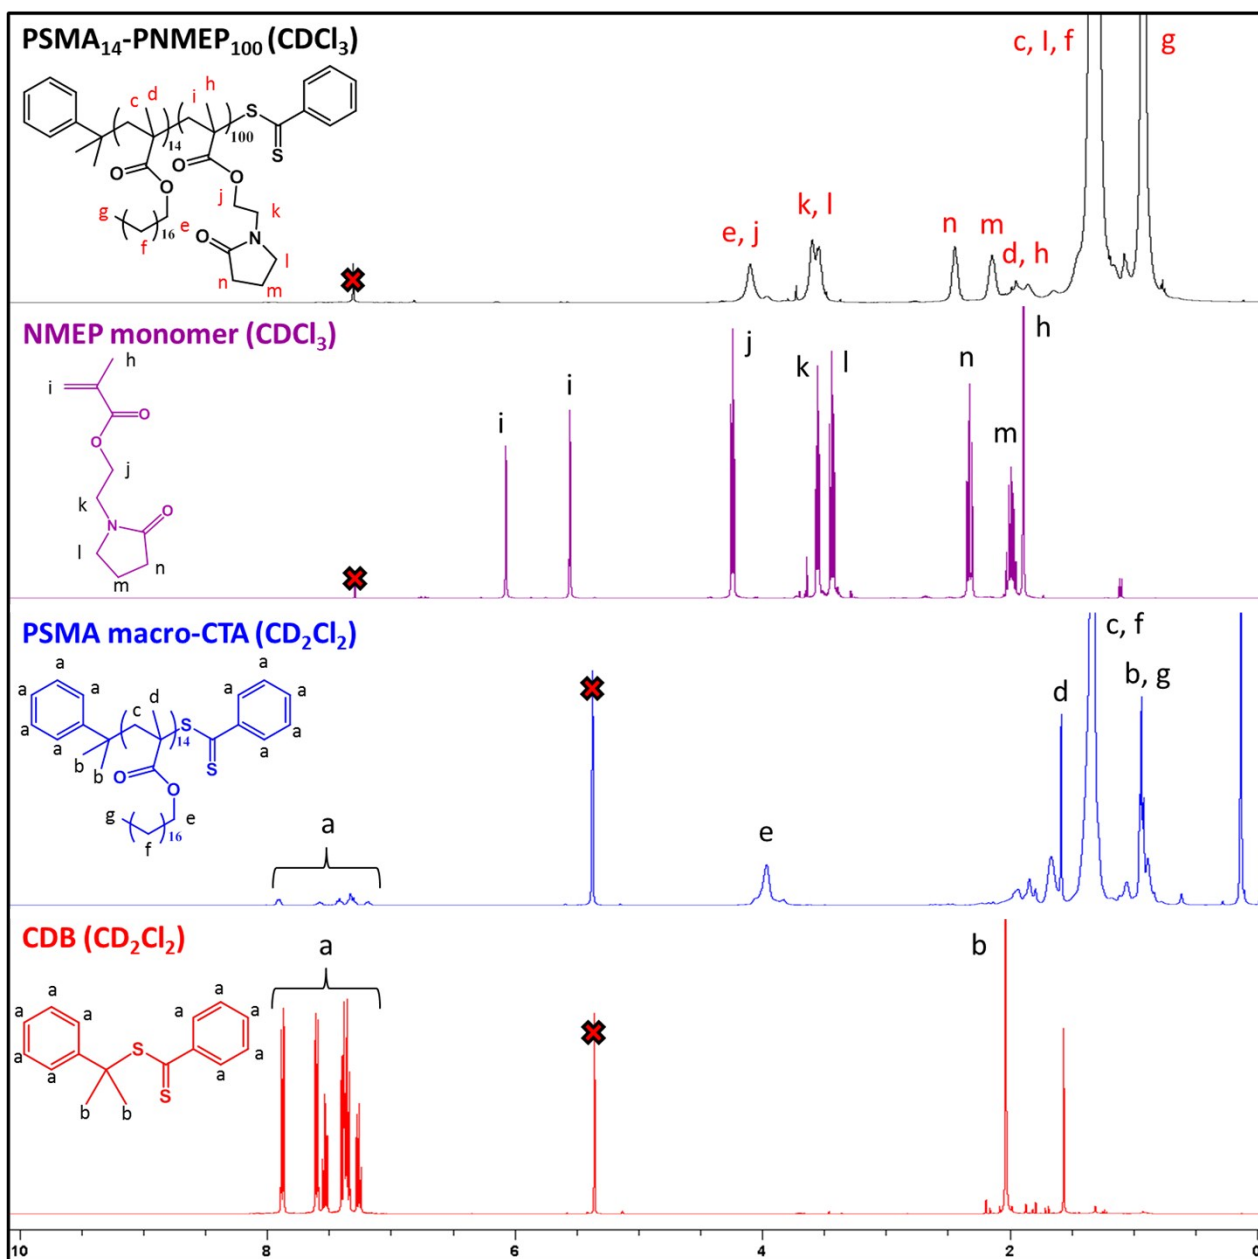

**Figure S2.** Assigned  $^1\text{H}$  NMR spectra obtained for the CDB RAFT agent, a PSMA<sub>14</sub> macro-CTA, the NMEP monomer and a PSMA<sub>14</sub>-PNMEP<sub>100</sub> diblock copolymer.

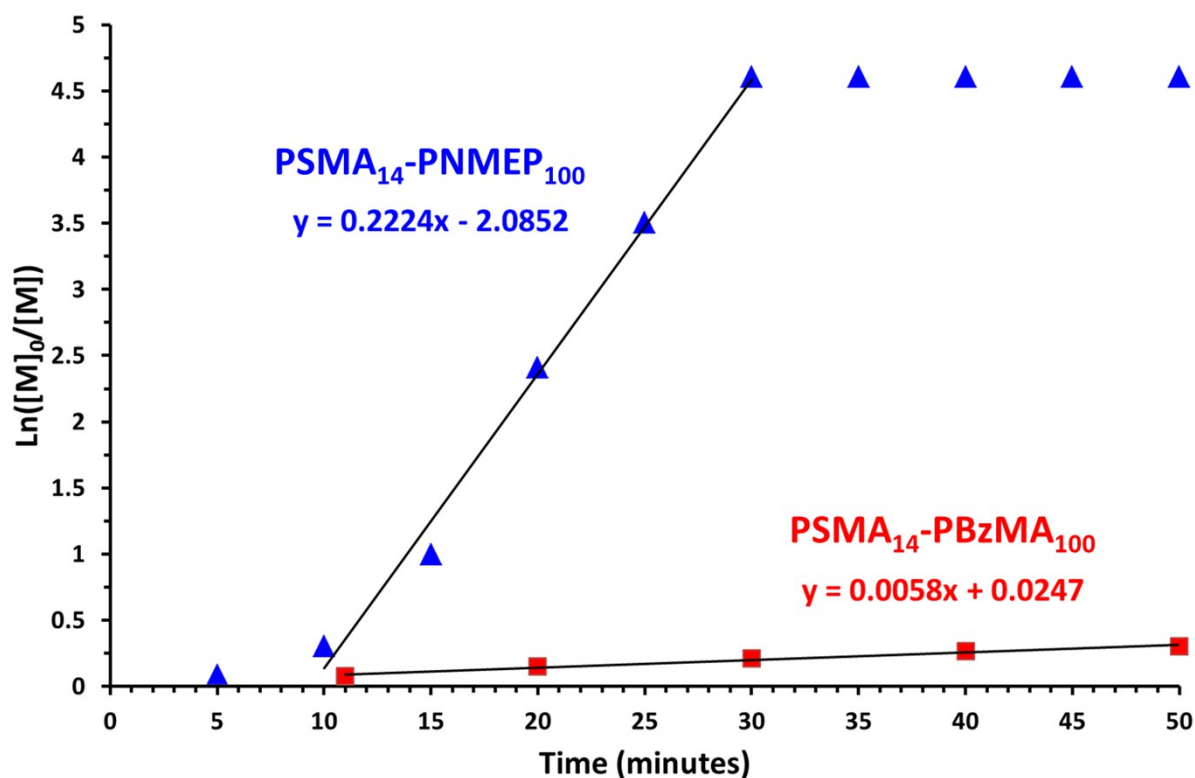

**Figure S3.** A plot of  $\ln([M]_0/[M])$  against time for the kinetics of RAFT dispersion polymerisation of either NMEP or BzMA at 90°C when targeting either PSMA<sub>14</sub>-PNMEP<sub>100</sub> (blue) or PSMA<sub>14</sub>-PBzMA<sub>100</sub> (red), respectively. A short induction period is observed for the PSMA<sub>14</sub>-PNMEP<sub>100</sub> formulation, but then the rate of this NMEP polymerisation proceeds with an apparent pseudo-first order rate constant that is 38 times greater than that of the BzMA polymerisation when targeting PSMA<sub>14</sub>-PBzMA<sub>100</sub>.

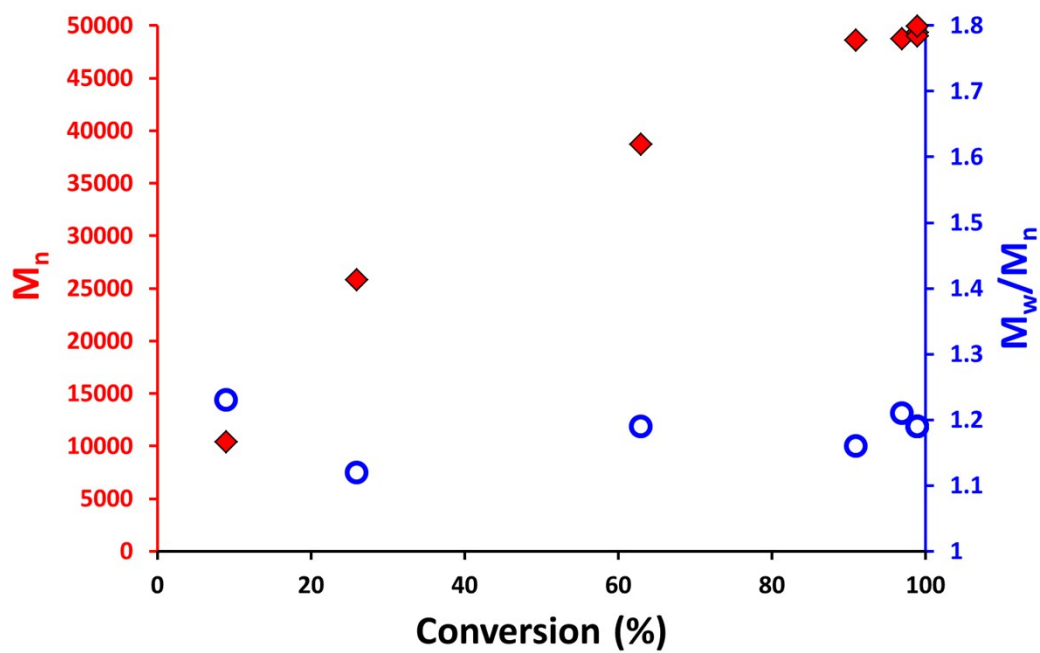

**Figure S4.** 3:1 Chloroform/methanol GPC data (versus a series of poly(methyl methacrylate) standards) obtained for the kinetics of polymerisation of NMEP when targeting  $PSMA_{14}$ - $PNMEP_{100}$

**Table S1.** Conversions, Molecular Weights ( $M_n$ ), Polydispersities ( $M_w/M_n$ ), DLS and TEM diameters obtained for PSMA<sub>14</sub>-PNMEP<sub>x</sub> (S<sub>14</sub>-N<sub>x</sub>) Diblock Copolymer Nanoparticles prepared at 20% w/w Solids and the corresponding PSMA<sub>14</sub> Macro-CTA prepared at 40 % w/w Solids.

|     | Diblock Composition               | Conversion <sup>a</sup> (%) | Solids content (% w/w) | 3:1 v/v% chloroform methanol GPC |             | Particle diameter     | Particle morphology |
|-----|-----------------------------------|-----------------------------|------------------------|----------------------------------|-------------|-----------------------|---------------------|
|     |                                   |                             |                        | $M_n^b$ (kg mol <sup>-1</sup> )  | $M_w/M_n^b$ | DLS <sup>c</sup> (nm) |                     |
| S1  | S <sub>14</sub>                   | 80                          | 40                     | 7.5                              | 1.12        | N/A                   | -                   |
| S2  | S <sub>14</sub> -N <sub>49</sub>  | 99                          | 20                     | 29.7                             | 1.15        | 26 (0.049)            | Spheres             |
| S3  | S <sub>14</sub> -N <sub>79</sub>  | 99                          | 20                     | 44.5                             | 1.22        | 36 (0.055)            | Spheres             |
| S4  | S <sub>14</sub> -N <sub>99</sub>  | 99                          | 20                     | 52.7                             | 1.27        | 39 (0.054)            | Spheres             |
| S5  | S <sub>14</sub> -N <sub>114</sub> | 95                          | 20                     | 63.3                             | 1.34        | 48 (0.054)            | Spheres             |
| S6  | S <sub>14</sub> -N <sub>149</sub> | 99                          | 20                     | 84.3                             | 1.59        | 151 (0.093)           | Mixed               |
| S7  | S <sub>14</sub> -N <sub>173</sub> | 99                          | 20                     | 85.0                             | 1.48        | 1174 (0.324)          | Mixed               |
| S8  | S <sub>14</sub> -N <sub>190</sub> | >99                         | 20                     | 89.8                             | 1.75        | 824 (0.305)           | Mixed               |
| S9  | S <sub>14</sub> -N <sub>198</sub> | 99                          | 20                     | 99.4                             | 2.01        | 722 (0.348)           | Worms               |
| S10 | S <sub>14</sub> -N <sub>209</sub> | 99                          | 20                     | 105.8                            | 1.79        | 729 (0.461)           | Mixed               |
| S11 | S <sub>14</sub> -N <sub>221</sub> | 98                          | 20                     | 111.5                            | 1.94        | 1370 (0.302)          | Mixed               |
| S12 | S <sub>14</sub> -N <sub>248</sub> | 99                          | 20                     | 121.9                            | 2.04        | 1169 (0.115)          | Mixed               |

a. Monomer conversion determined by <sup>1</sup>H NMR spectroscopy in CDCl<sub>3</sub>.

b. Determined by 3:1 v/v chloroform/methanol GPC against poly(methyl methacrylate) calibration standards using a refractive index detector.

c. The numbers in brackets refer to the DLS polydispersity

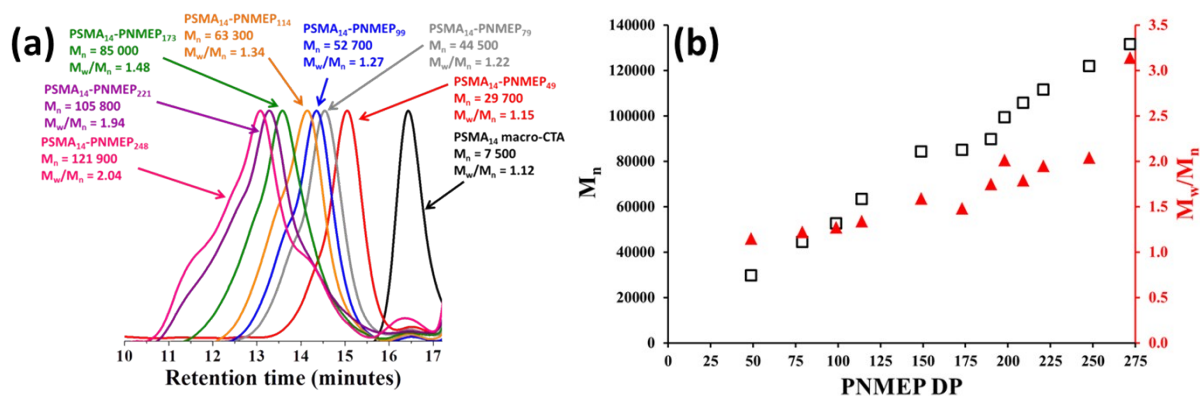

**Figure S5.** (a) 3:1 Chloroform/methanol GPC curves obtained for a selection of PSMA<sub>14</sub>-PNMEP<sub>x</sub> diblock copolymer nanoparticles prepared at 20% w/w solids via RAFT dispersion polymerisation of NMEP at 90 °C. (b) A plot of M<sub>n</sub> (black axis) and M<sub>w</sub>/M<sub>n</sub> (red axis) against PNMEP DP for the same series of PSMA<sub>14</sub>-PNMEP<sub>x</sub> diblock copolymer nanoparticles.

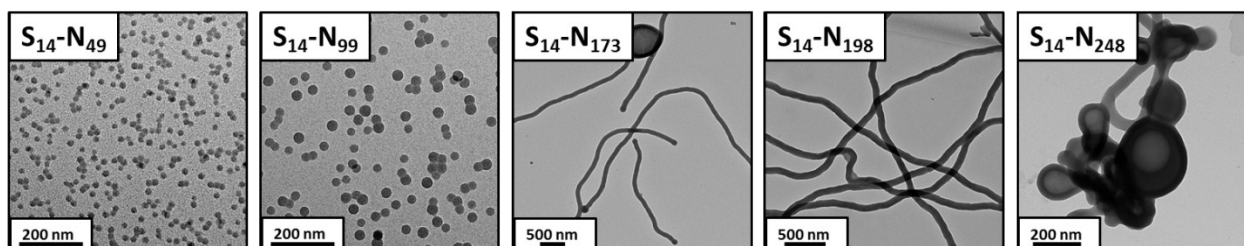

**Figure S6.** Representative TEM images obtained for PSMA<sub>14</sub>-PNMEP<sub>x</sub> diblock copolymer nano-objects prepared via RAFT dispersion polymerisation of NMEP at 20% w/w solids.

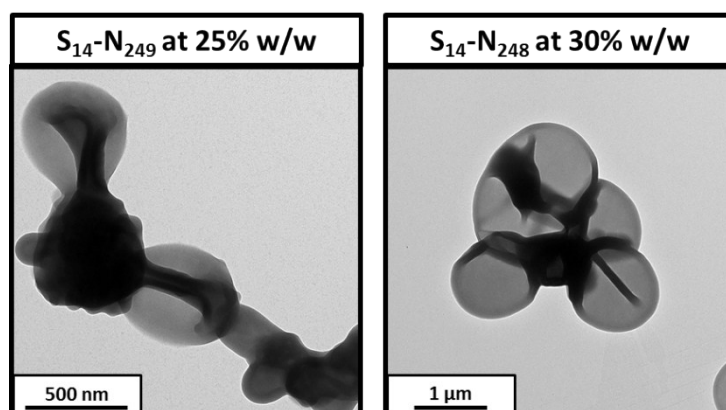

**Figure S7.** Representative TEM images recorded for the unstable precipitate phase obtained for PSMA<sub>14</sub>-PNMEP<sub>x</sub> syntheses conducted at either 25% or 30% solids when targeting a PNMEP DP of 250.

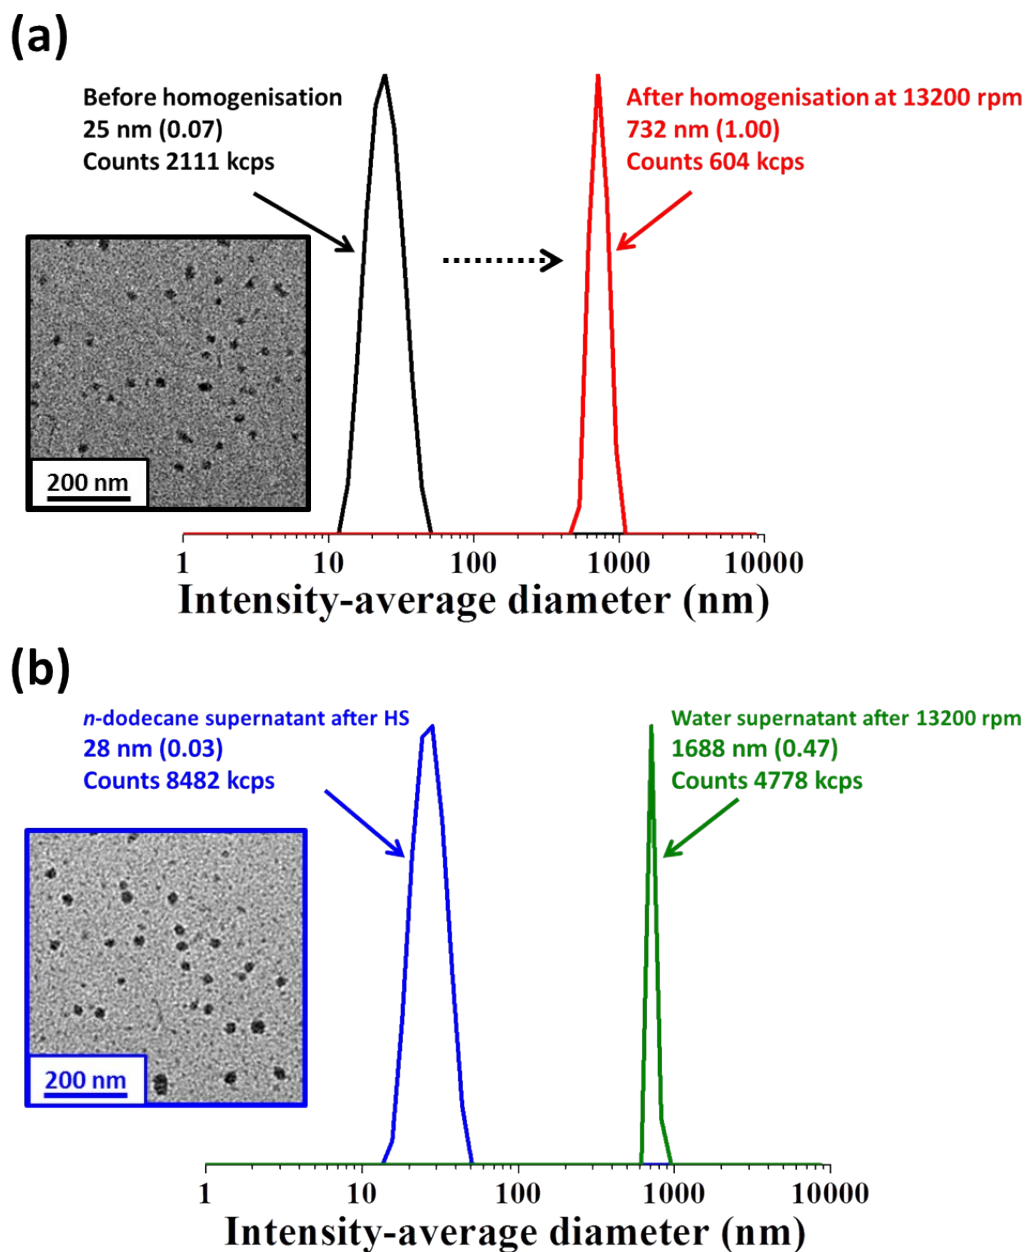

**Figure S8.** (a) DLS particle size distributions obtained at 25°C for PSMA<sub>14</sub>-PNMEP<sub>49</sub> nanoparticles before (black) and after (red) homogenisation at 13,200 rpm at 20°C. High shear homogenisation causes the initial 25 nm spherical nanoparticles to break up, resulting in a relatively low count rate and a very high polydispersity. Inset: TEM image before homogenisation. (b) DLS particle size distributions obtained for the *supernatants* (after gravitational sedimentation of the aqueous droplet phase on standing at 20°C overnight) of water-in-oil emulsions prepared using 1.0% w/w PSMA<sub>14</sub>-PNMEP<sub>49</sub> nanoparticles. The blue trace shows the DLS size distribution (and corresponding TEM image) obtained for the *n*-dodecane *supernatant* of the water-in-oil emulsion prepared by hand-shaking, confirming that these nanoparticles are stable to homogenisation at *low* shear (hand-shaking). The green trace shows the *aqueous* supernatant of the oil-in-water emulsion obtained after preparation via homogenisation at 13,200 rpm.



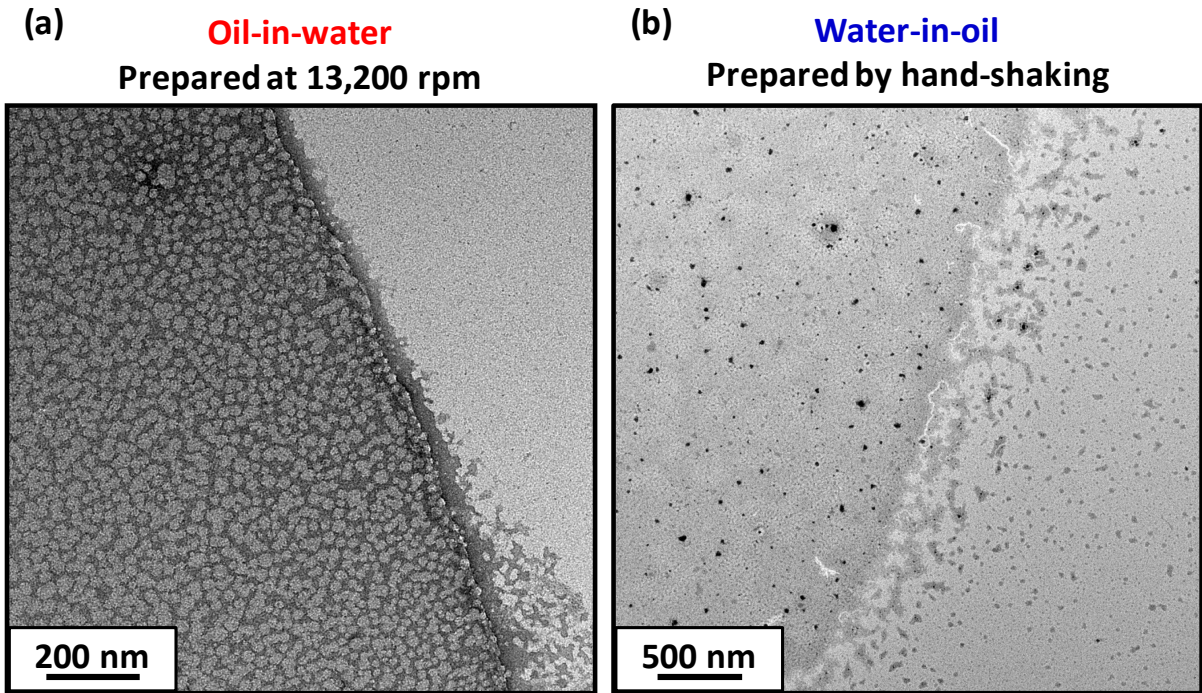

**Figure S9.** Transmission electron microscopy of Pickering emulsion droplets prepared using PSMA<sub>14</sub>-PNMEP<sub>49</sub>; (a) an oil-in-water droplet prepared at 13,200 rpm and stained using uranyl formate and (b) a water-in-oil droplet prepared by hand-shaking and stained using ruthenium(VIII) oxide. Both show the presence of spherical nanoparticles absorbing at the oil-water interface.

(a)

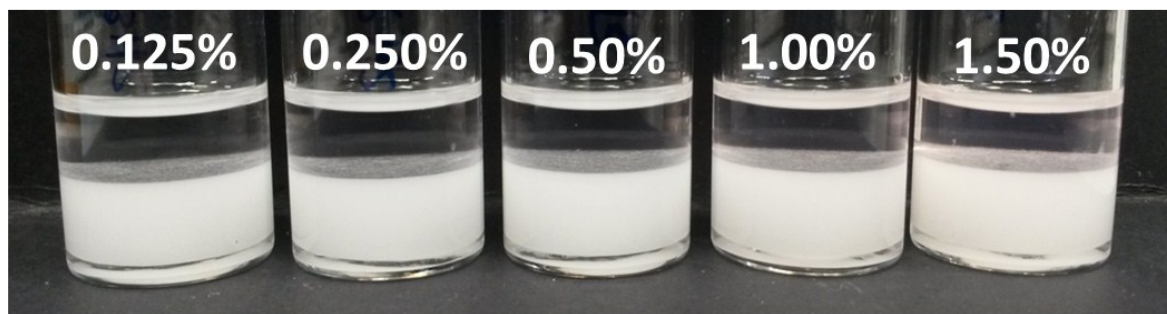

(b)

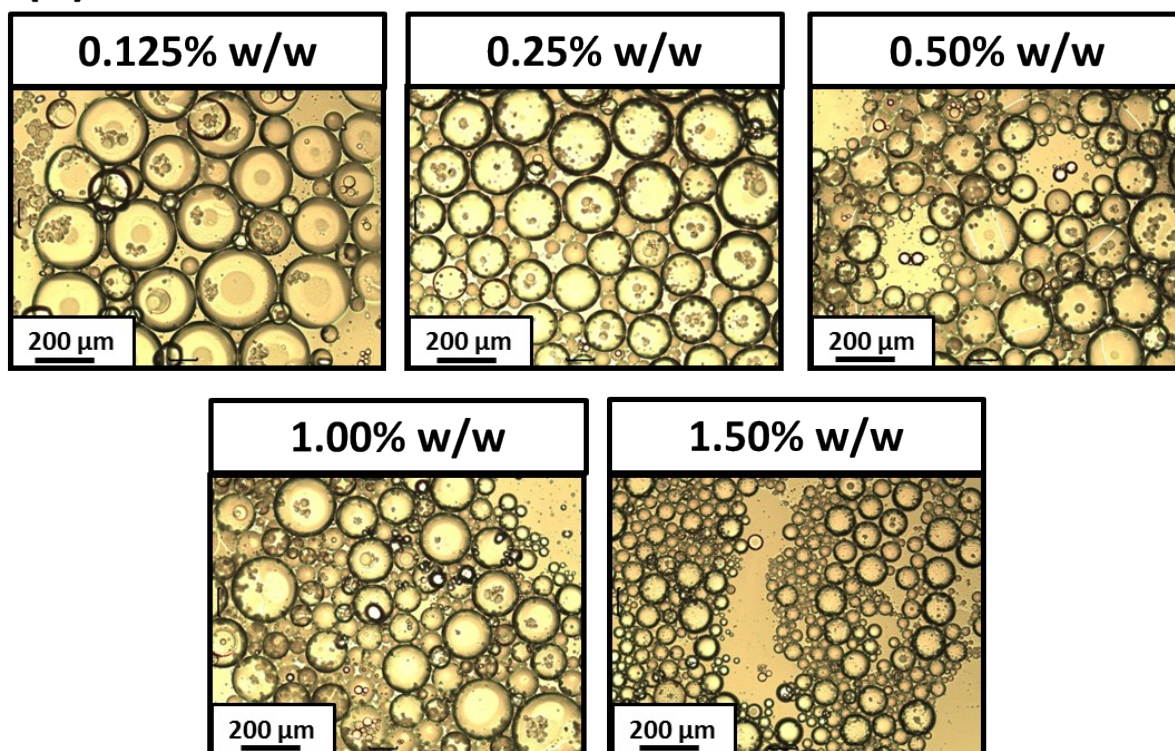

**Figure S10.** Water-in-oil emulsions prepared by hand-shaking of 50:50v/v mixtures of *n*-dodecane and water using either 0.125%, 0.25%, 0.50%, 1.00% or 1.50% w/w PSMA<sub>14</sub>-PNMEP<sub>49</sub> nanoparticles: (a) digital photograph of the resulting five emulsions and (b) corresponding optical microscopy images.

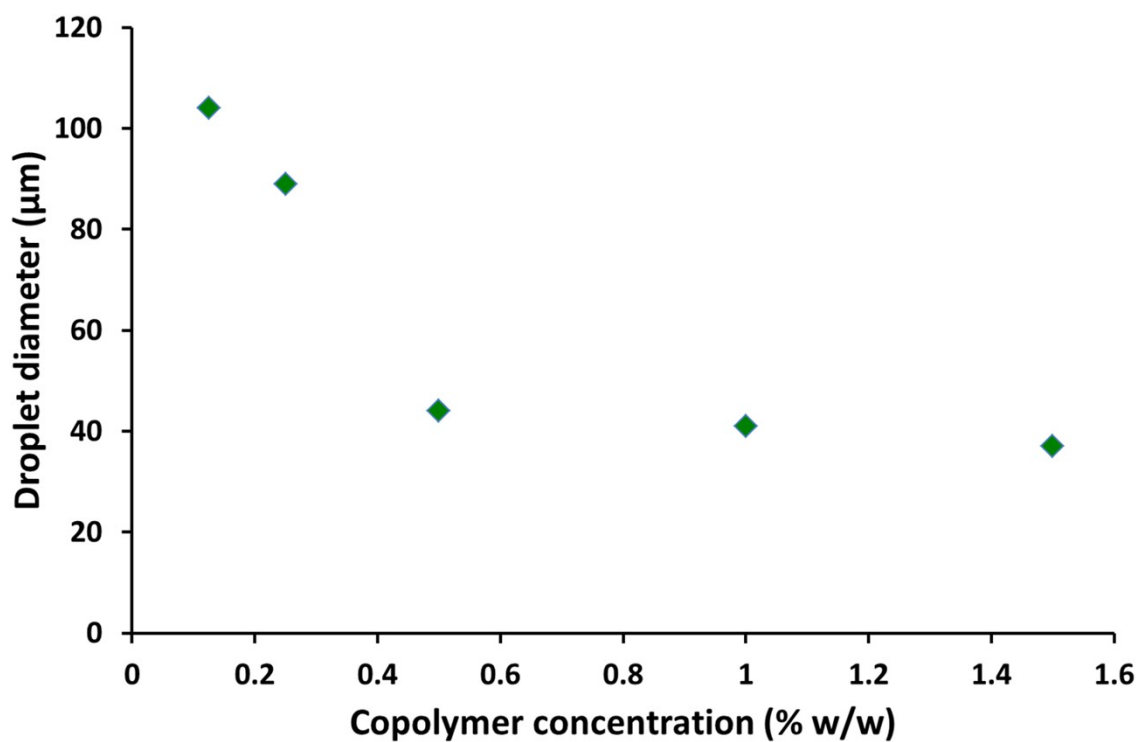

**Figure S11.** Concentration dependence of the mean aqueous droplet diameter obtained for the water-in-oil emulsions prepared by hand-shaking using either 0.125%, 0.25% 0.50%, 1.00% or 1.50% w/w PSMA<sub>14</sub>-PNMEP<sub>49</sub> nanoparticles. Mean droplet diameters were estimated from optical microscopy images by analysing at least 100 droplets.

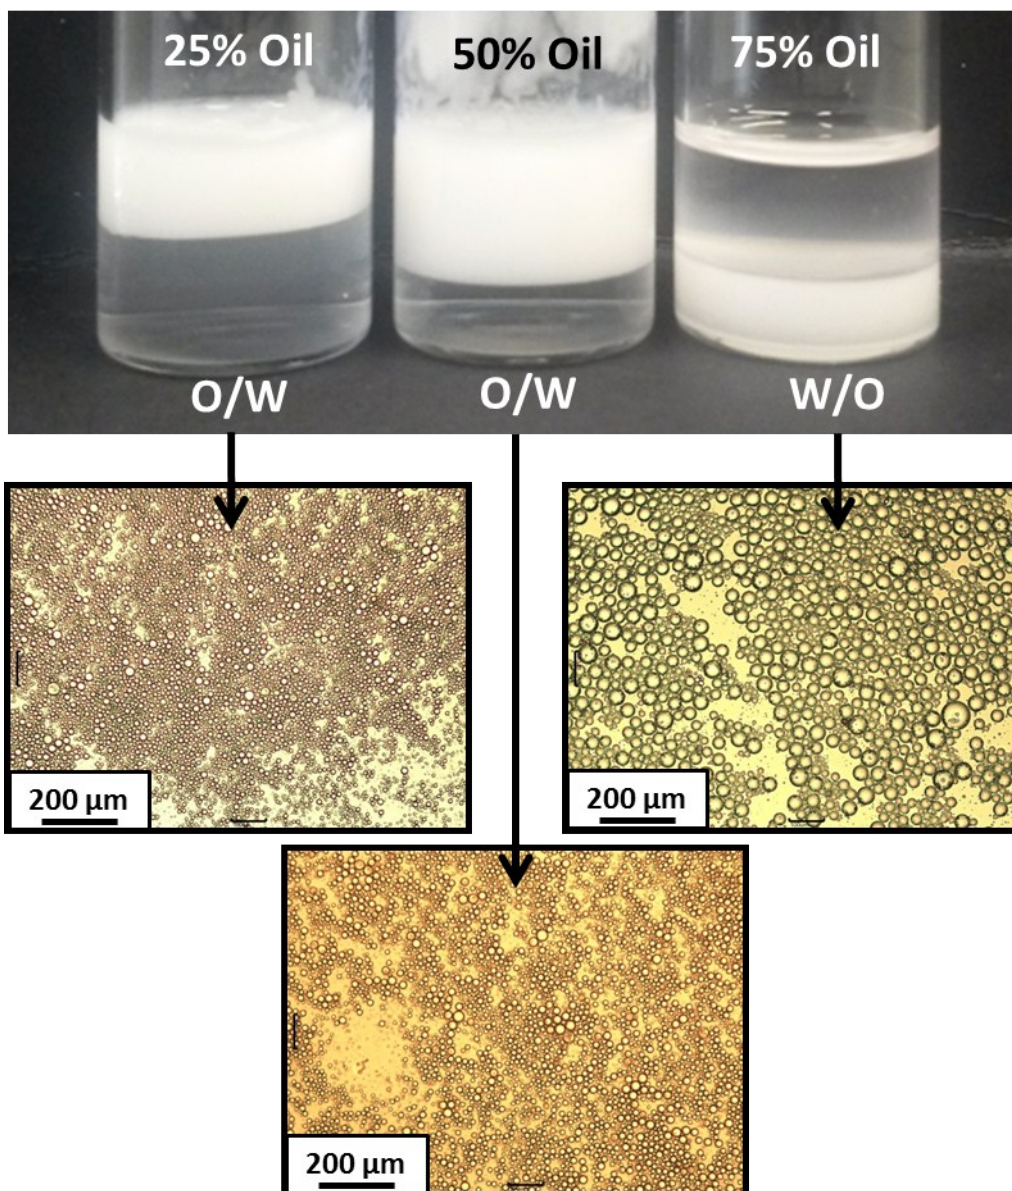

**Figure S12.** Digital photographs and corresponding optical microscopy images obtained for PSMA<sub>14</sub>-PNMEP<sub>49</sub> emulsions formed using water volume fractions 0.25, 0.50 or 0.75 relative to *n*-dodecane. Emulsions were prepared using 0.5% w/w PSMA<sub>14</sub>-PNMEP<sub>49</sub> nanoparticles at 13,200 rpm. The latter water volume fractions resulted in the formation of *oil-in-water* emulsions, whereas the lowest water volume fraction produced a *water-in-oil* emulsion.
